# Supplementary material
Source: MDPI journal article supplement (https://www.mdpi.com/2227-9040/10/12/518)
Supplement: s1 [file s1 › chemosensors-2020115-supplementary.pdf]

## Supplementary information

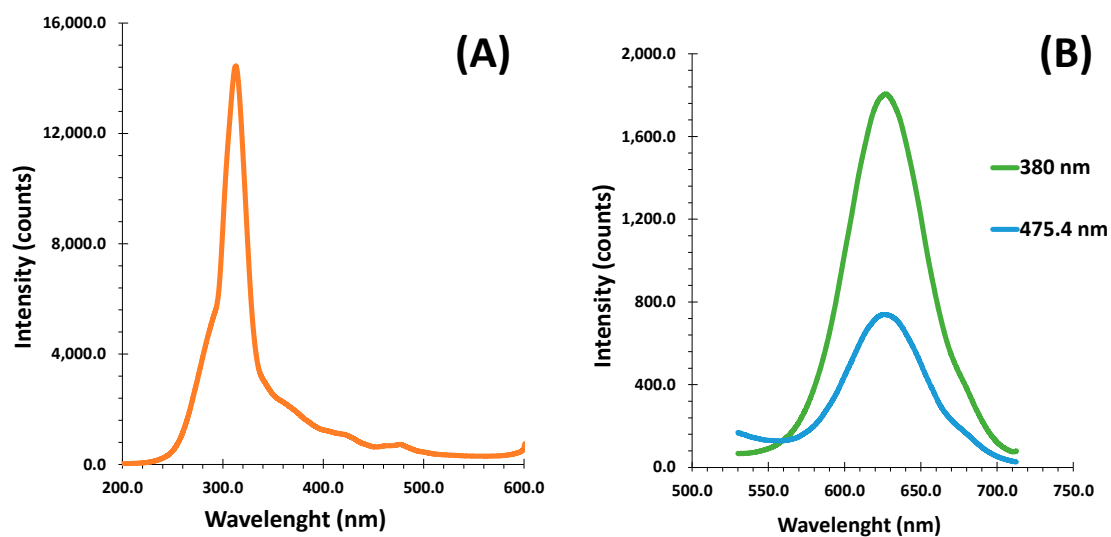

**Figure S1.** (A) Excitation spectrum of CdTe@MPA QDs in phosphate buffer at the emission of 580 nm. (B) Emission spectra of CdTe@MPA QDs in phosphate buffer upon excitation into 380 (green) and 475.4 nm (blue).

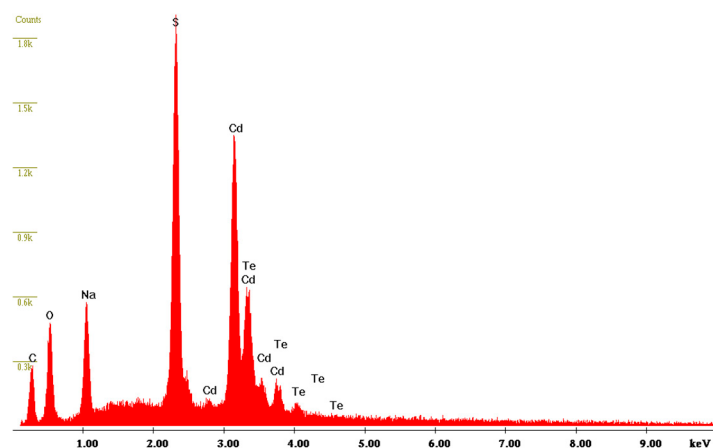

| Element | Wt %  | At %  |
|---------|-------|-------|
| C       | 10.56 | 28.53 |
| O       | 15.36 | 31.13 |
| Na      | 6.56  | 9.26  |
| S       | 16.34 | 16.53 |
| Cd      | 44.86 | 12.95 |
| Te      | 6.33  | 1.61  |

**Figure S2.** EDS analysis of the QDs.

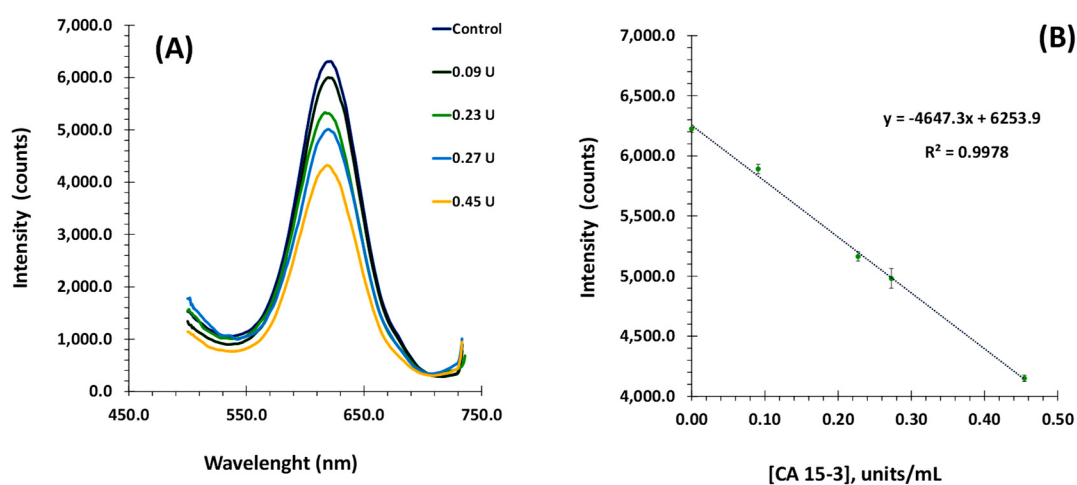

**Figure S3.** (A) Emission spectra of the QDs conjugates upon CA 15-3 protein recognition. The calibration curve was performed in PBS 10mM pH 7.4. (B) The analysis was conducted using a photomultiplier tube voltage of 410 PMT and an excitation wavelength of 380 nm (n=3).
